## P506

**Brugada Syndrome: is the addition of the electrocardiographic risk markers the clue?**

Tronconi A.; Camero G.; Mysuta M.; Bozza A.; Peltzer M.; Labin B.; Gavilan L.; Ramirez D.; Alvarez M.; Gonzalez JL.; Galizio N.

Favaloro Foundation University Hospital, Buenos Aires, Argentina

**Background:** Risk stratification in Brugada Syndrome (BS) remains a clinical challenge. Several electrocardiographic (ECG) risk markers had been described, as a spontaneous type 1 Brugada pattern (ST1B), maximal time interval between the peak and the end of the t wave in precordial leads (Tpe Max), the presence of an S Wave on DI, a PR interval (PRi)  $\geq 200$ ms and fragmented QRS (f-QRS).

**Purpose:** Evaluate the association of ECG risk markers with sudden cardiac death (SCD) or appropriate shocks (A-Sh) by implantable cardioverter defibrillator (ICD) in patients (p) with BS.

**Methods:** From a registry of 97 p with BS with a median follow up of 2.3 years (Q1 0.7-Q3 7.8), 12 lead ECG were recorded in every p. QT peak interval (QTp) was measured between the QRS onset and the peak of the T wave. Tpe was calculated between the difference of QT and QTp in precordial leads (V1 to V6). TpeMax was defined as the most prolonged Tpe. If an S-DI was present, duration and amplitude was measured. PRi was measured on DI. Baseline characteristics: Age  $44 \pm 13$  years, male 74 (76%), secondary prevention 2 (3%), malignant syncope 10 (10%), inducible electrophysiology study 22/43 (51%), SCD on first grade family < 35 years 12 (12%) and ICD 34 (35%). A-Sh and SCD were compared among p with ST1B vs no ST1B, TpeMax  $\geq 100$  vs <100ms, S-DI  $\geq 0.4$  vs <0.4ms, S-D  $\geq 0.1$  vs <0.1mV, PRi  $\geq 200$  vs <200ms and presence of f-QRS  $\geq 2$  spike  $\geq 2$  leads. Variables that were associated with A-Sh or SCD were combined. For variables with significant difference sensibility (Sen) and specificity (Spe) was calculated.

**Results:** During follow up 6 p presented A-Sh and no p SCD. Results are described in the Table.

**Conclusion:** In our study population, there was a significant higher incidence of A-Sh in p with ST1B, Tpe Max  $\geq 100$ ms and S-DI  $\geq 0.1$ mV. We found that the presence of one ECG risk marker had a high sensibility to predict A-Sh. The presence of the 3 ECG risk markers highly increased specificity to predict A-Sh. Further trials should be carried out to asses if ECG risk markers would allow us to differentiate which asymptomatic patients could benefit from electrophysiological study for risk stratification (high sensibility - One ECG Risk marker) or would benefit from ICD implantation (high specificity - 3 ECG Risk markers).

Abstract Figure.

| Table                                              |              |                                         |             | p        | Sen  | Spe |
|----------------------------------------------------|--------------|-----------------------------------------|-------------|----------|------|-----|
| ST1B                                               | 5/36 (13.8%) | No ST1B                                 | 1/61 (1.6%) | 0.01     | 83%  | 63% |
| Tpe Max $\geq 100$ ms                              | 6/38 (15%)   | Tpe < 100ms                             | 0/59 (0%)   | 0.001    | 100% | 61% |
| S-DI $\geq 0.4$ ms                                 | 4/36 (11.1%) | S-DI < 0.4ms                            | 2/61 (3.2%) | 0.1      |      |     |
| S-DI $\geq 0.1$ mV                                 | 5/41 (12.2%) | S-DI < 0.1mV                            | 1/55 (1.8%) | 0.03     | 83%  | 57% |
| f-QRS                                              | 1/7 (14.3%)  | No f-QRS                                | 5/90 (5.5%) | 0.2      |      |     |
| PRi $\geq 200$ ms                                  | 3/32 (9.3%)  | PRi < 200ms                             | 3/65 (4.6%) | 0.3      |      |     |
| Tpe Max $\geq 100$ ms and S-DI $\geq 0.1$ mV       | 5/21 (23.8%) | Tpe Max < 100ms or S-DI < 0.1mV         | 1/76 (1.3%) | 0.0001   | 83%  | 78% |
| Tpe Max $\geq 100$ ms and ST1B                     | 5/20 (25%)   | Tpe Max < 100ms or ST1B                 | 1/77 (1.2%) | 0.00009  | 83%  | 79% |
| ST1B and S-DI $\geq 0.1$ mV                        | 4/18 (22.2%) | No ST1B or S-DI < 0.1mV                 | 2/79 (2.5%) | 0.001    | 67%  | 81% |
| Tpe Max $\geq 100$ ms, ST1B and S-DI $\geq 0.1$ mV | 4/8 (50%)    | Tpe Max < 100ms or ST1B or S-DI < 0.1mV | 2/79 (2.5%) | 0.000001 | 67%  | 91% |
